# Supplementary material for: Assessing the health estimation capacity of air pollution exposure prediction models
Source: PubMed Central journal article supplement (PMC8928613; doi:10.1186/s12940-022-00844-0), 2022-03-17
Supplement: 12940_2022_844_MOESM1_ESM.pdf [file 12940_2022_844_MOESM1_ESM.pdf]

# Assessing the health estimation capacity of air pollution exposure prediction models

Additional file

## Contents

|                                                                                                                                                                                                                                                                                                                                                                                                                                                                                                                                                                                                  |          |
|--------------------------------------------------------------------------------------------------------------------------------------------------------------------------------------------------------------------------------------------------------------------------------------------------------------------------------------------------------------------------------------------------------------------------------------------------------------------------------------------------------------------------------------------------------------------------------------------------|----------|
| <b>Section A. Simulated seasonal, monthly, and acute time trends</b>                                                                                                                                                                                                                                                                                                                                                                                                                                                                                                                             | <b>1</b> |
| <b>Figure S1. Comparing simulated observed time series and model predictions using overall model performance (orange circles) and frequency band <math>k</math> model performance (triangles) for correlation <math>r</math>, <math>RMSE</math>, and <math>LVR</math>. For model predictions, classical error <math>w^k(t)</math> was added to simulated observations at frequency bands <math>k = 1, \dots, 6</math> with magnitude of error <math>\sigma_c = \{0.2, 0.4, 0.6, 0.8\}</math>. Results are shown for frequency band <math>k</math> (<math>k = 1, 2</math>) model performance.</b> | <b>2</b> |
| Figure S1a. Frequency band $k = 1$ model performance (purple triangles)                                                                                                                                                                                                                                                                                                                                                                                                                                                                                                                          | 2        |
| Figure S1b. Frequency band $k = 2$ model performance (pink triangles)                                                                                                                                                                                                                                                                                                                                                                                                                                                                                                                            | 3        |
| <b>Figure S2. Comparing simulated observed time series and model predictions using overall model performance (orange circles) and frequency band <math>k = 6</math> model performance (green triangles) for correlation <math>r</math>, <math>RMSE</math>, and <math>LVR</math> with magnitude of error <math>\sigma_c = \{0.2, 0.4, 0.6, 0.8\}</math>. This plot shows the impact of changing the variance of the seasonal component of the simulated observed time series, <math>\text{Var}(x_{(1)}(t)) \in \{1^2, 1.5^2, 2^2\}</math>.</b>                                                    | <b>4</b> |
| <b>Figure S3. Map of 17 <math>PM_{2.5}</math> monitors across 8 US cities.</b>                                                                                                                                                                                                                                                                                                                                                                                                                                                                                                                   | <b>5</b> |
| <b>Table S1. For each monitor ID, table of the corresponding city and state, number of days of data, number and percent of imputed monitor observations, and median (interquartile range) <math>PM_{2.5}</math> (<math>\mu g/m^3</math>) for both the monitoring data and FAQSD.</b>                                                                                                                                                                                                                                                                                                             | <b>5</b> |
| <b>References</b>                                                                                                                                                                                                                                                                                                                                                                                                                                                                                                                                                                                | <b>6</b> |

## Section A. Simulated seasonal, monthly, and acute time trends

To create timescale components for  $k = 1, 2, 6$ , we specified  $x^k(t) = \frac{\tilde{x}^k(t)}{\text{Var}(\tilde{x}^k(t))}$  where

$$\tilde{x}^k(t) = \cos\left(\frac{2\pi\gamma}{365} \times t\right)$$

corresponding to  $\gamma$  cycles per year. For the seasonal trend ( $k = 1$ ), we set  $\gamma = 1$  such that one complete cycle was completed each year. For the monthly ( $k = 2$ ), we set  $\gamma = 8$ , which fits within the second frequency band of [6-12] cycles per year from Dominici et al. 2003 (Dominici et al. 2003). Last, for the acute trend ( $k = 6$ ), we specified  $\gamma = 180$ , or approximately a cycle every two days.

Figure S1. Comparing simulated observed time series and model predictions using overall model performance (orange circles) and frequency band  $k$  model performance (triangles) for correlation  $r$ ,  $RMSE$ , and  $LVR$ . For model predictions, classical error  $w^k(t)$  was added to simulated observations at frequency bands  $k = 1, \dots, 6$  with magnitude of error  $\sigma_c = \{0.2, 0.4, 0.6, 0.8\}$ . Results are shown for frequency band  $k$  ( $k = 1, 2$ ) model performance.

Figure S1a. Frequency band  $k = 1$  model performance (purple triangles)

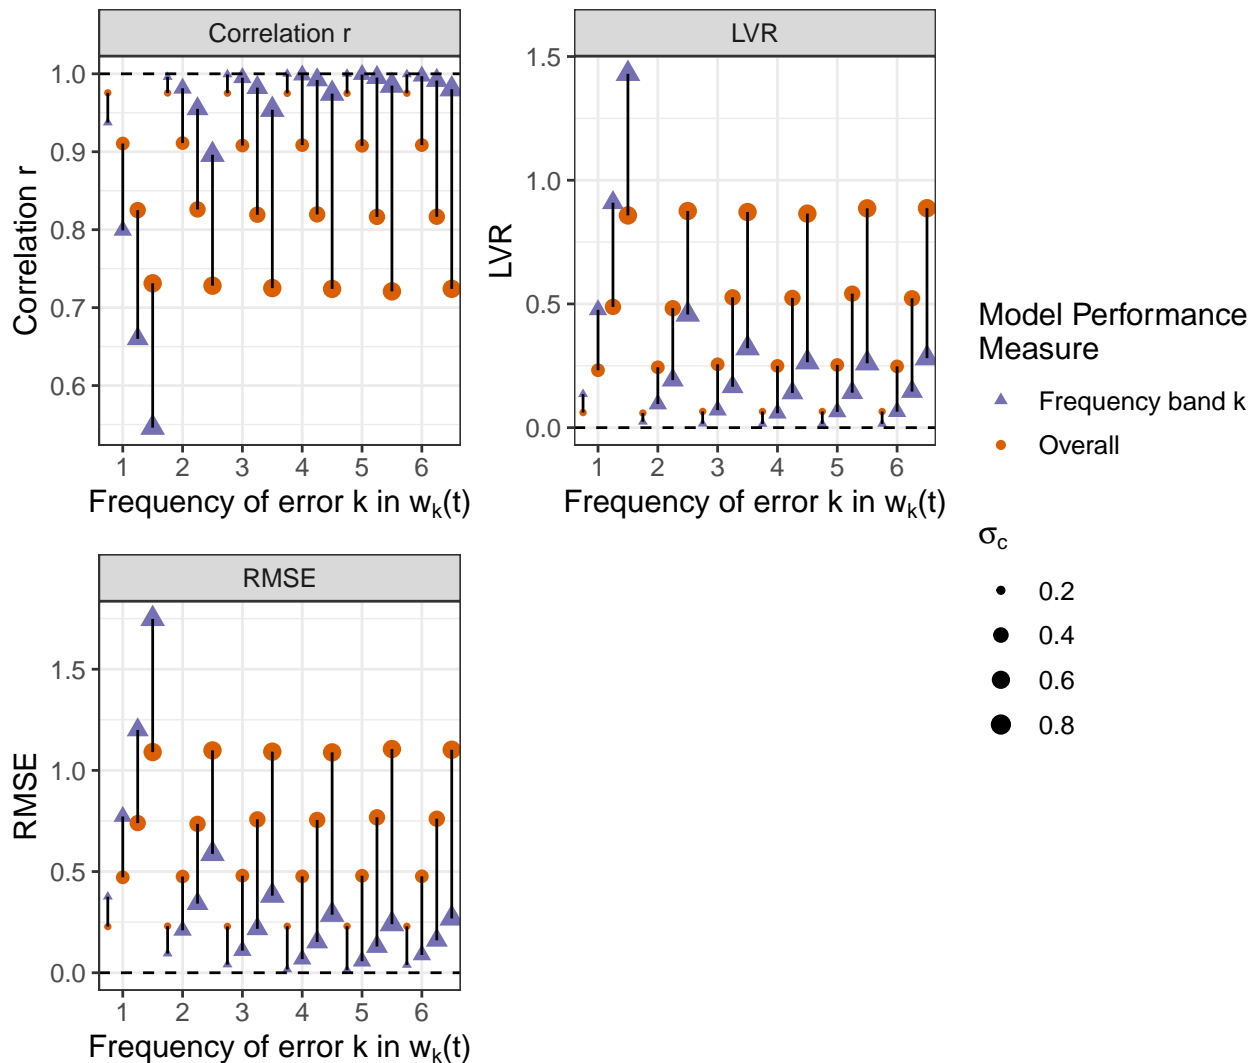

Figure S1b. Frequency band  $k = 2$  model performance (pink triangles)

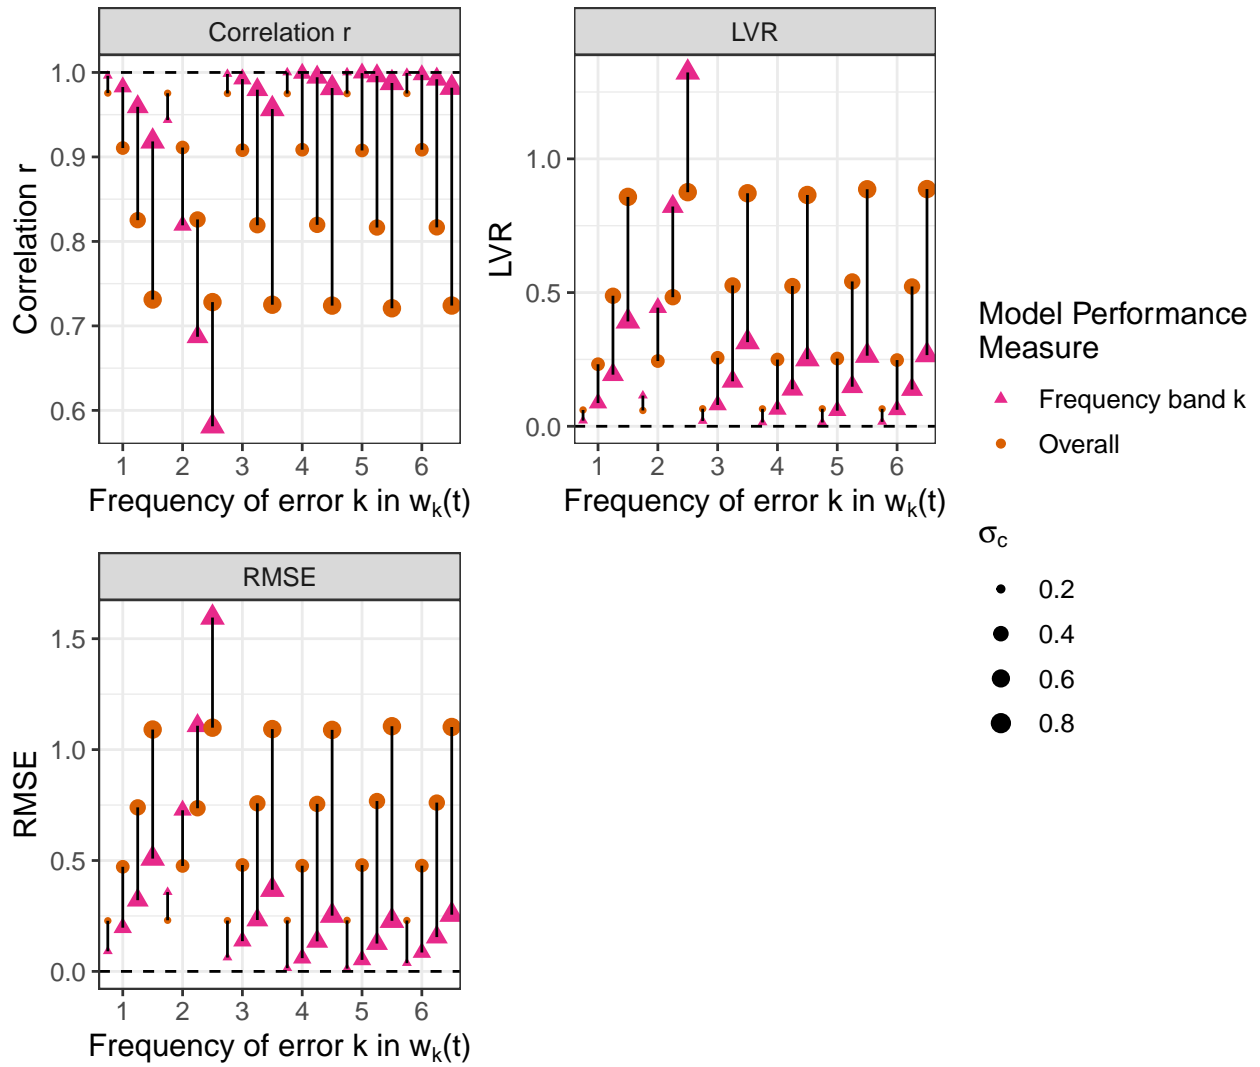

Figure S2. Comparing simulated observed time series and model predictions using overall model performance (orange circles) and frequency band  $k = 6$  model performance (green triangles) for correlation  $r$ ,  $RMSE$ , and  $LVR$  with magnitude of error  $\sigma_c = \{0.2, 0.4, 0.6, 0.8\}$ . This plot shows the impact of changing the variance of the seasonal component of the simulated observed time series,  $\text{Var}(x_{(1)}(t)) \in \{1^2, 1.5^2, 2^2\}$ .

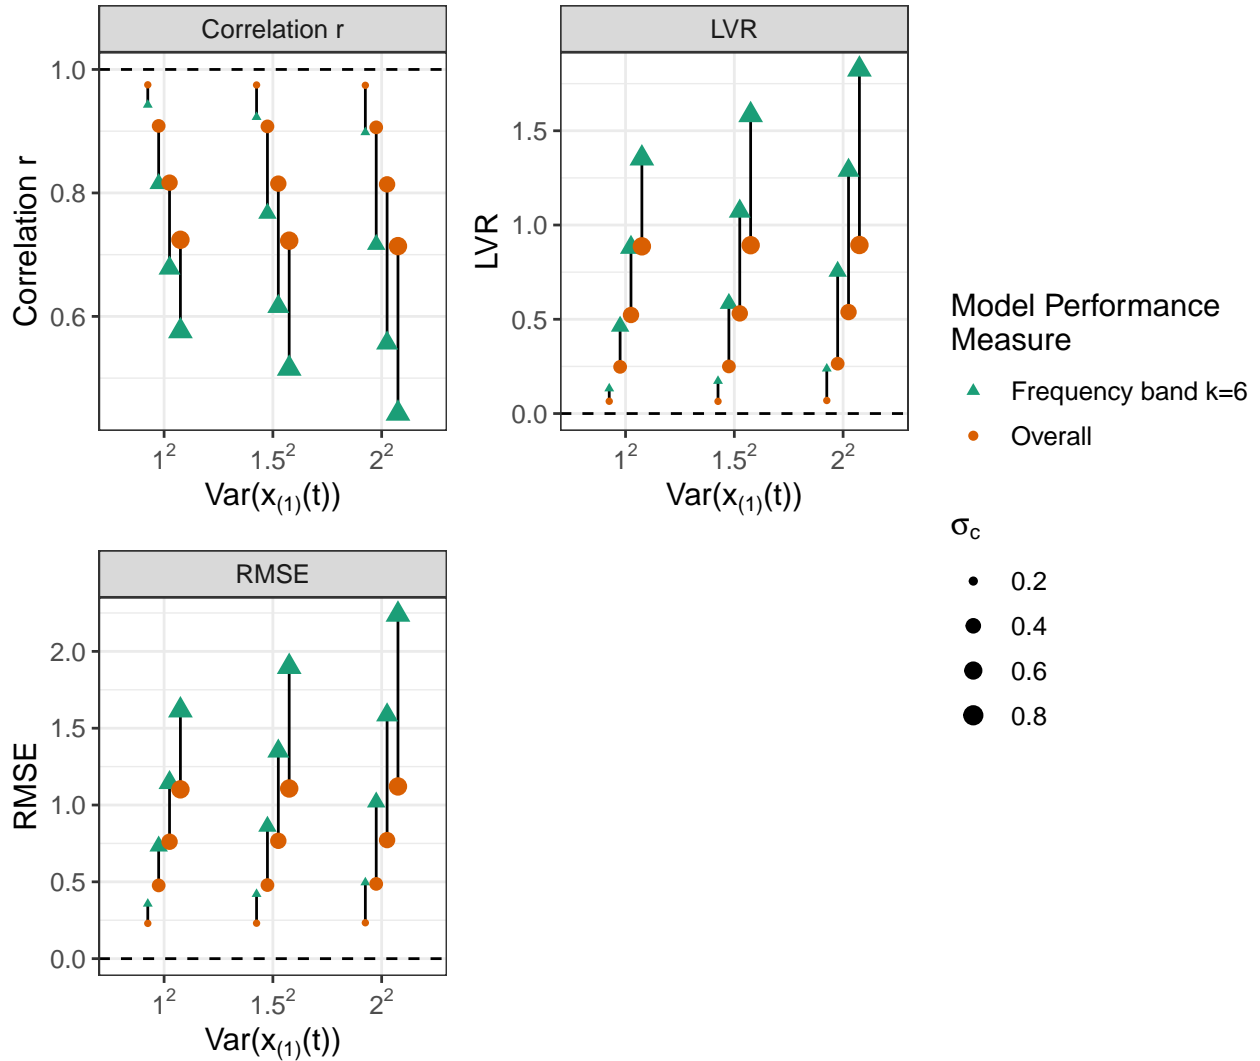

**Figure S3.** Map of 17 PM<sub>2.5</sub> monitors across 8 US cities.

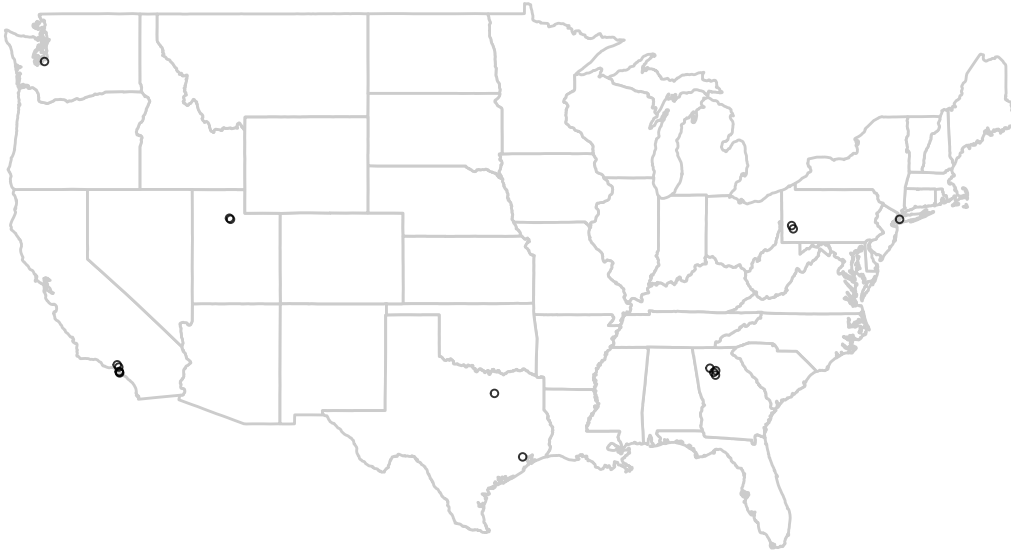

**Table S1.** For each monitor ID, table of the corresponding city and state, number of days of data, number and percent of imputed monitor observations, and median (interquartile range) PM<sub>2.5</sub> ( $\mu\text{g}/\text{m}^3$ ) for both the monitoring data and FAQSD.

| Monitor ID | City           | State        | Days | Imputed ( $N$ (%)) | Monitor<br>(Median (IQR)) | FAQSD<br>(Median (IQR)) |
|------------|----------------|--------------|------|--------------------|---------------------------|-------------------------|
| 060371002  | Los Angeles    | California   | 990  | 58 (5.9)           | 11.8 (5.3)                | 11.16 (5.14)            |
| 060371103  | Los Angeles    | California   | 1422 | 147 (10.3)         | 12 (4.97)                 | 11.93 (5.72)            |
| 060374002  | Los Angeles    | California   | 1527 | 126 (8.3)          | 10.3 (4.35)               | 10.61 (5.02)            |
| 060374004  | Los Angeles    | California   | 1093 | 46 (4.2)           | 9.3 (4.6)                 | 10.65 (5.05)            |
| 060374008  | Los Angeles    | California   | 1074 | 46 (4.3)           | 11.45 (5.1)               | 11.12 (5.23)            |
| 130670003  | Atlanta        | Georgia      | 1052 | 58 (5.5)           | 10.3 (5.82)               | 10.12 (5.79)            |
| 130890002  | Atlanta        | Georgia      | 1051 | 68 (6.5)           | 10.13 (5.3)               | 10.23 (5.79)            |
| 130892001  | Atlanta        | Georgia      | 686  | 47 (6.9)           | 10.7 (5.47)               | 10.98 (5.84)            |
| 131210032  | Atlanta        | Georgia      | 686  | 27 (3.9)           | 10.5 (5.8)                | 11 (5.85)               |
| 360810124  | New York       | New York     | 2351 | 141 (6)            | 7 (5.1)                   | 7.88 (5.91)             |
| 420030008  | Pittsburgh     | Pennsylvania | 593  | 18 (3)             | 9 (5.5)                   | 10.26 (6.1)             |
| 420030064  | Pittsburgh     | Pennsylvania | 960  | 53 (5.5)           | 13.1 (10.8)               | 11.6 (8.64)             |
| 481130069  | Dallas         | Texas        | 1250 | 39 (3.1)           | 8.9 (5.4)                 | 9.5 (5.14)              |
| 482011035  | Houston        | Texas        | 1645 | 72 (4.4)           | 11.16 (5.1)               | 11.05 (4.82)            |
| 490353006  | Salt Lake City | Utah         | 958  | 64 (6.7)           | 6 (4.32)                  | 6.24 (4.76)             |
| 490353010  | Salt Lake City | Utah         | 1003 | 83 (8.3)           | 7.2 (5.55)                | 6.49 (5.6)              |
| 530530029  | Seattle/Tacoma | Washington   | 1547 | 106 (6.9)          | 5.4 (4.1)                 | 5.69 (4.6)              |

## References

Dominici, Francesca, Aidan McDermott, Scott L Zeger, and Jonathan M Samet. 2003. "Airborne Particulate Matter and Mortality: Timescale Effects in Four Us Cities." *American Journal of Epidemiology* 157 (12): 1055–65.
